# Supplementary material
Source: PubMed Central journal article supplement (PMC9489525)
Supplement: mmc1.pdf [file mmc1.pdf]

## **Fatigue and cognitive impairment after COVID-19: a prospective multicentre study**

Tim J. Hartung, MD MA<sup>1,2</sup> \*, Christian Neumann, BSc<sup>3</sup> \*, Thomas Bahmer, MD<sup>4,5</sup>, Irina Chaplinskaya-Sobol, MSc<sup>6</sup>, Matthias Endres, MD<sup>1,7,8,9,10</sup>, Johanna Geritz, Dipl.-Psy.<sup>3</sup>, Karl Georg Haeusler, MD<sup>11</sup>, Peter U. Heuschmann, MD<sup>12,13</sup>, Hanna Hildesheim, MD<sup>3</sup>, Andreas Hinz, PhD<sup>2</sup>, Sina Hopff, MD<sup>14</sup>, Anna Horn<sup>12</sup>, Michael Krawczak, PhD<sup>15</sup>, Lilian Krist, MD<sup>16</sup>, Jennifer Kudelka, MD<sup>3</sup>, Wolfgang Lieb, MD MSc<sup>17</sup>, Corina Maetzler, MA<sup>3</sup>, Anja Mehnert-Theuerkauf, PhD<sup>2</sup>, Felipe A. Montellano, MD<sup>12,11,18</sup>, Caroline Morbach, MD<sup>19</sup>, Sein Schmidt, MD<sup>20</sup>, Stefan Schreiber, MD<sup>21</sup>, Flo Steigerwald<sup>1</sup>, Stefan Störk, MD, PhD<sup>22,23</sup>, Walter Maetzler, MD<sup>3</sup> \*, Carsten Finke, MD<sup>1</sup> \*

\* contributed equally

*1 Klinik und Hochschulambulanz für Neurologie, Charité-Universitätsmedizin Berlin*

*2 Department of Medical Psychology and Medical Sociology, University Medical Center Leipzig, Leipzig, Germany*

*3 Neurology Department, University Medical Center Schleswig-Holstein, Campus Kiel*

*4 Internal Medicine Department I, University Hospital Schleswig Holstein, Campus Kiel*

*5 Airway Research Center North (ARCN), German Center for Lung Research (DZL)*

*6 Department of Medical Informatics, University Medical Center Göttingen*

*7 Center for Stroke Research Berlin*

*8 Excellence Cluster NeuroCure*

*9 German Center for Neurodegenerative Diseases (DZNE), partner site Berlin*

*10 German Centre for Cardiovascular Research (DZHK), partner site Berlin*

*11 Department of Neurology, Universitätsklinikum Würzburg*

*12 Institute of Clinical Epidemiology and Biometry, University of Würzburg*

*13 Clinical Trial Center, University Hospital Würzburg*

*14 University of Cologne, Faculty of Medicine and University Hospital Cologne, Department I of Internal Medicine, Center for Integrated Oncology Aachen Bonn Cologne Duesseldorf*

*15 Institute of Medical Informatics and Statistics, Kiel University, University Medical Center Schleswig-Holstein Campus Kiel*

*16 Institute of Social Medicine, Epidemiology and Health Economics, Charité-Universitätsmedizin Berlin*

*17 Institute of Epidemiology, Kiel University, Kiel, Germany*

*18 Comprehensive Heart Failure Center, University and University Hospital Würzburg*

*19 University Hospital Würzburg, Department for Medicine I and Comprehensive Heart Failure Center*

*20 Berlin Institute of Health at Charité – Universitätsmedizin Berlin, Clinical Study Center*

*21 Universitätsklinikum Schleswig-Holstein, Christian-Albrechts-Universität zu Kiel, Klinik für Innere Medizin I*

*22 Department of Clinical Research & Epidemiology, Comprehensive Heart Failure Center, University Hospital Würzburg*

*23 Department of Internal Medicine I, University Hospital Würzburg*

## eText 1. Supplementary Acknowledgements.

We thank all representatives of contributing NAPKON sites: University Hospital Schleswig-Holstein, Kiel (Enderle J), University Hospital Wuerzburg, Wuerzburg (Frantz S), University Hospital Wuerzburg, Wuerzburg (Hein G), University Hospital Schleswig-Holstein, Kiel (Hermes A), University Hospital Wuerzburg, Wuerzburg (Isberner N), University Hospital Wuerzburg, Wuerzburg (Jahns R), University Hospital Wuerzburg, Wuerzburg (Kohls M), University Hospital Schleswig-Holstein, Kiel (Lehmann I), University Hospital Schleswig-Holstein, University Hospital Wuerzburg, Wuerzburg (Reese J-P), Kiel (Reinke L), University Hospital Schleswig-Holstein, Kiel (Tittman L), University Hospital Wuerzburg, Wuerzburg (Weissbrich B).

We also thank all representatives of participating NUM infrastructure that contributed to this study: University Hospital Frankfurt, Frankfurt (Appel K), University Medicine Greifswald, Greifswald (Bahls T), University of Wuerzburg, Wuerzburg (Bauer C), University Hospital Cologne, Cologne (Brechtel M), University Medicine Goettingen, Goettingen (Chaplinskaya I), University of Wuerzburg, Wuerzburg (Fiessler C), University Hospital Cologne, Cologne (Fuhrmann S), University of Wuerzburg, Wuerzburg (Goester M), University of Wuerzburg, Wuerzburg (Grau A), University Medicine Goettingen, Goettingen (Hanß S), German Center for Cardiovascular Diseases (DZHK), Berlin (Hoffmann J), University Medicine Greifswald, Greifswald (Hoffmann W), University Hospital Cologne, Cologne (Hopff SM), University of Wuerzburg, Wuerzburg (Jiru-Hillmann S), University of Wuerzburg, Wuerzburg (Kammerer K), University of Wuerzburg, Wuerzburg (Kohls M), Helmholtz Center Munich, Munich (Kraus M), University Medicine Goettingen, Goettingen (Krefting D), University Hospital Cologne, Cologne (Lee C), Charité - Universitaetsmedizin Berlin, Berlin (Lorbeer R), University of Wuerzburg, Wuerzburg (Miljukov O), University Medicine Greifswald, Greifswald (Nauck M), University Hospital Cologne, Cologne (Nunnendorf M), University Medicine Goettingen, Goettingen (Pape C), University Medicine Greifswald, Greifswald (Schäfer C), Charité - Universitaetsmedizin Berlin, Berlin (Schaller J), University Medicine Greifswald, Greifswald (Schattschneider M), University Hospital Cologne, Cologne (Schmidt Ibanez C), University Hospital Frankfurt, Frankfurt (Schneider J), University Medicine Greifswald, Greifswald (Stahl D), University of Wuerzburg, Wuerzburg (Ungethuem K), University Medicine Greifswald, Greifswald (Valtentin H), University Hospital Cologne and University Hospital Frankfurt, Cologne and Frankfurt (Vehreschild J).

In addition, we are grateful to the NAPKON Steering Committee: University Hospital Giessen and Marburg, Giessen (Herold S), University of Wuerzburg, Wuerzburg (Heuschmann P), Charité - Universitaetsmedizin Berlin, Berlin (Heyder R), University Medicine Greifswald, Greifswald (Hoffmann W), Hannover Unified Biobank, Hannover Medical School, Hannover (Illig T), Robert Koch Institute, Department of Epidemiology and Health Monitoring, Berlin (Neuhauser H), University Hospital Schleswig-Holstein, Kiel (Schreiber S), University Hospital Cologne and University Hospital Frankfurt, Cologne and Frankfurt (Vehreschild J), Jena University Hospital, Jena (von Lilienfeld-Toal M), Charité - Universitaetsmedizin Berlin, Berlin (Witzenrath M).

And we thank the NAPKON Use & Access Committee: University Medicine Goettingen, Goettingen (Blaschke S), Lahn-Dill-Clinics, Wetzlar (Ellert C), LMU clinic of the university of munich, Munich (Frank S), University Hospital Schleswig-Holstein, Kiel (Friedrichs A), University of Wuerzburg, Wuerzburg (Heuschmann P), Hannover Unified Biobank, Hannover Medical School, Hannover (Illig T), University Hospital Wuerzburg, Wuerzburg (Meybohm P), LMU clinic of the university of munich, Munich (Milger K), University

Medicine Oldenburg, Oldenburg (Petersmann A), University Hospital Technical University Munich , Munich (Schmidt G), University Hospital Schleswig-Holstein, Kiel (Schreiber S), University Hospital Cologne and University Hospital Frankfurt, Cologne and Frankfurt (Vehreschild J), Jena University Hospital, Jena (von Lilienfeld-Toal M), Charité - Universitaetsmedizin Berlin, Berlin (Witzenrath M), University Hospital Essen, Essen (Witzke O).

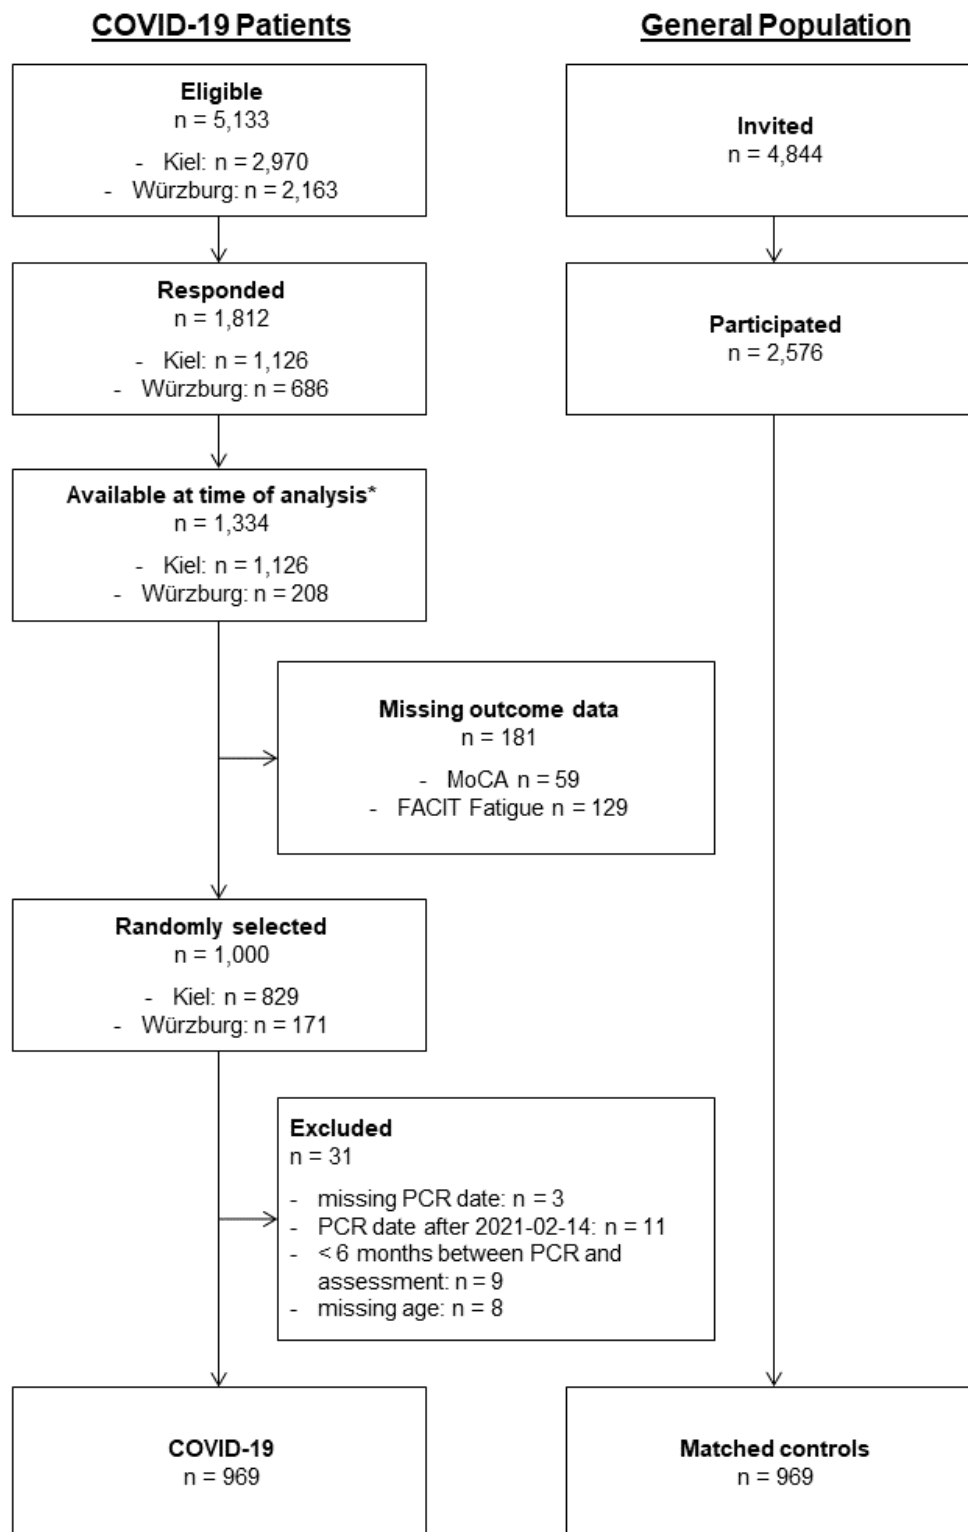

**eFigure 1.** Recruitment flow chart. Data collection and recruitment are still ongoing for this cohort. The required sample size of  $n=1000$  was based upon previous power calculations. The final data set was compiled as soon as the sample size was reached. \* At the time of data compilation (19 January 2022).

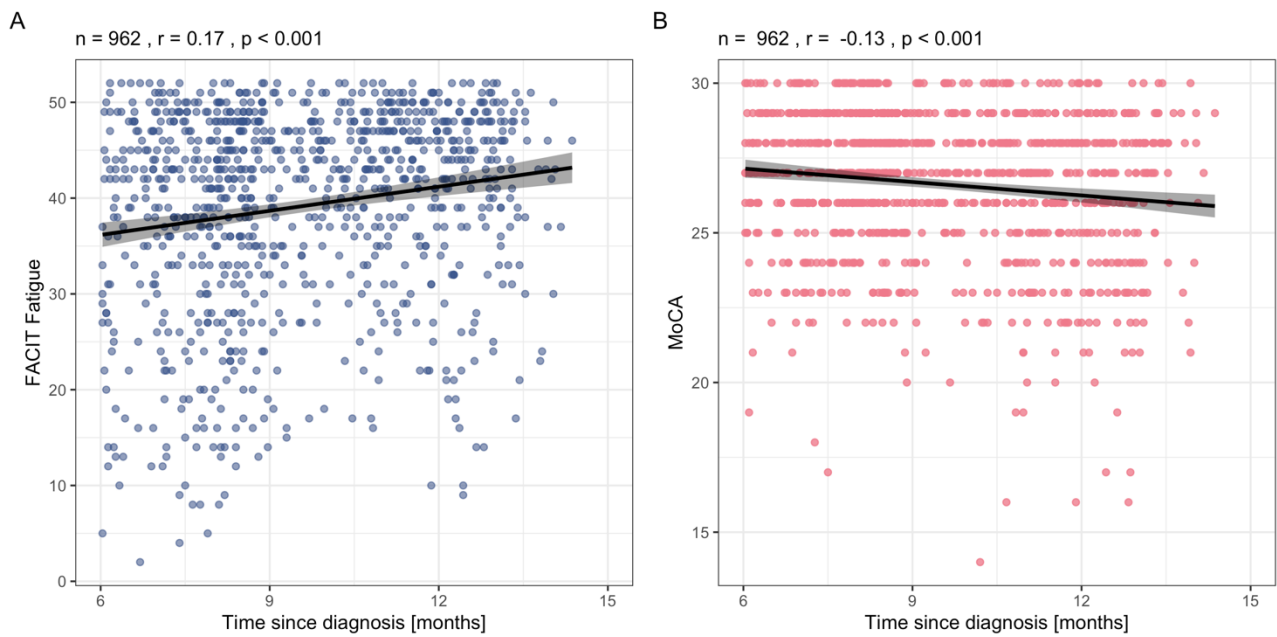

**eFigure 2.** Sensitivity analysis excluding n = 7 patients assessed > 15 months after infection: Association between time since diagnosis of SARS-CoV-2 infection and (A) FACIT fatigue score and (B) Montreal Cognitive Assessment (MoCA) score. r, Pearson correlation coefficient, trend line indicates univariate linear regression, shaded area 95% confidence interval.

**eTable 1.** Detailed patient sample characteristics and main outcomes including number of available cases (N) for each variable.

| Characteristic                         | N   | n (%) / M (SD) |
|----------------------------------------|-----|----------------|
| <b><u>Pre-COVID comorbidity</u></b>    |     |                |
| Migraine                               | 958 | 92 (10%)       |
| Epilepsy                               | 966 | 9 (1%)         |
| Ischemic stroke                        | 965 | 8 (1%)         |
| Multiple sclerosis                     | 969 | 5 (1%)         |
| Parkinson                              | 969 | 1 (0%)         |
| Haemorrhagic stroke                    | 964 | 0 (0%)         |
| Dementia                               | 968 | 0 (0%)         |
| Other neurological disease             | 967 | 6 (1%)         |
| Depression disorder                    | 956 | 100 (10%)      |
| Anxiety disorder                       | 965 | 33 (3%)        |
| Psychotic disorder                     | 967 | 3 (0%)         |
| Hypertension                           | 966 | 222 (23%)      |
| Coronary artery disease                | 962 | 33 (3%)        |
| Atrial fibrillation                    | 767 | 17 (2%)        |
| Myocardial infarction                  | 966 | 11 (1%)        |
| Other arrhythmia                       | 767 | 10 (1%)        |
| Heart failure                          | 955 | 9 (1%)         |
| Carotid artery stenosis                | 765 | 3 (0%)         |
| Peripheral artery disease              | 766 | 0 (0%)         |
| Other cardiovascular disease           | 954 | 62 (6%)        |
| Long-term medication                   | 921 | 488 (53%)      |
| <b><u>Clinical characteristics</u></b> |     |                |
| Covid wave                             | 969 |                |
| First                                  |     | 481 (50%)      |
| Second                                 |     | 488 (50%)      |
| Hospitalization duration [days]        | 63  | 32 (86)        |
| <b><u>Acute Covid Symptoms</u></b>     |     |                |
| Headache                               | 882 | 662 (75%)      |
| Limb pain                              | 887 | 655 (74%)      |
| Dysgeusia                              | 884 | 611 (69%)      |
| Dysosmia                               | 871 | 602 (69%)      |
| Cough                                  | 890 | 589 (66%)      |
| Sore throat                            | 882 | 568 (64%)      |
| Fever                                  | 871 | 549 (63%)      |
| Myalgia                                | 872 | 513 (59%)      |
| Dyspnoea                               | 873 | 506 (58%)      |
| Chills                                 | 889 | 425 (48%)      |
| Rhinorrhoea                            | 871 | 416 (48%)      |
| Dizziness                              | 869 | 393 (45%)      |
| Thorax pain                            | 877 | 286 (33%)      |
| Hoarseness                             | 873 | 248 (28%)      |
| Diarrhoea                              | 873 | 221 (25%)      |
| Nausea                                 | 876 | 204 (23%)      |
| Wheeze                                 | 859 | 203 (24%)      |
| Confusion                              | 856 | 152 (18%)      |
| Abdominal pain                         | 872 | 151 (17%)      |
| Hair loss                              | 770 | 87 (11%)       |
| Rash                                   | 885 | 80 (9%)        |
| Vomiting                               | 901 | 41 (5%)        |
| Other acute COVID symptoms             | 897 | 353 (39%)      |

| <b>Post-COVID characteristics</b>   |     |           |
|-------------------------------------|-----|-----------|
| Any persisting symptoms             | 896 | 473 (53%) |
| Anaemia                             | 958 | 74 (8%)   |
| Macrocytic hyperchromic             |     | 2 (3%)    |
| Microcytic hypochromic              |     | 18 (24%)  |
| Normocytic normochromic             |     | 54 (73%)  |
| Thyroid hormones                    | 923 |           |
| Latent hyperthyroidism              |     | 1 (0%)    |
| Latent hypothyroidism               |     | 26 (3%)   |
| Low T3 syndrome                     |     | 58 (6%)   |
| Normal                              |     | 838 (91%) |
| MoCA (M, SD)                        | 969 | 27 (2)    |
| Cognitive impairment                | 969 |           |
| Mild impairment                     |     | 256 (26%) |
| Moderate impairment                 |     | 7 (1%)    |
| No impairment                       |     | 706 (73%) |
| FACIT fatigue (M, SD)               | 969 | 39 (10)   |
| Fatigue severity                    | 969 |           |
| Normal                              |     | 423 (44%) |
| Mild ( $\leq 43$ )                  |     | 358 (37%) |
| Clinically relevant ( $\leq 30$ )   |     | 188 (19%) |
| Depression symptom severity (PHQ-8) | 946 |           |
| None/minimal                        |     | 523 (55%) |
| Mild                                |     | 273 (29%) |
| Moderate                            |     | 103 (11%) |
| Moderately Severe                   |     | 38 (4%)   |
| Severe                              |     | 9 (1%)    |
| Anxiety symptom severity (GAD-7)    | 948 |           |
| None/minimal                        |     | 685 (72%) |
| Mild                                |     | 180 (19%) |
| Moderate                            |     | 59 (6%)   |
| Severe                              |     | 24 (3%)   |
| Sleep problems (PSQI $\geq 5$ )     | 634 | 513 (81%) |

**eTable 2.** Multivariable linear regression model of acute COVID symptoms associated with FACIT fatigue, ≥6 months after infection (R<sup>2</sup>=0.19).

| <b>Characteristic</b> | <b>Beta</b> | <b>95% CI<sup>1</sup></b> | <b>p</b>         |
|-----------------------|-------------|---------------------------|------------------|
| Altered consciousness | -4.1        | -6.1, -2.1                | <b>&lt;0.001</b> |
| Dizziness             | -3.1        | -4.7, -1.6                | <b>&lt;0.001</b> |
| Myalgia               | -2.7        | -4.2, -1.1                | <b>&lt;0.001</b> |
| Thorax pain           | -2.5        | -4.1, -0.89               | <b>0.002</b>     |
| Dyspnoea              | -2.0        | -3.5, -0.48               | <b>0.010</b>     |
| Dysosmia              | -1.6        | -3.1, -0.14               | <b>0.033</b>     |
| Rash                  | -2.4        | -4.8, -0.07               | <b>0.044</b>     |
